# Supplementary material
Source: PubMed Central journal article supplement (PMC2797189)
Supplement: supp_M109.008417_jbc.M109.008417-4.pdf [file supp_M109.008417_jbc.M109.008417-4.pdf]

### Human vs Mouse P1 alignment

```

hNFYC_P1  AGATAAGTATGAAAAATCCATGCTCATAGTAGCTGGT+TTCCAACTGCGTGATAAAAAC
mNFYC_P1  -----RGT+TTG--GAATTTTATTTCTCCTACTCTAGCTGGTGTGTGTGTGTGTG-----
          * * * * *
hNFYC_P1  TTTAAAATCTGCATTCAAAATAAGAACCAACTATGTGCGACGTAAG---GTTACAAGCTAACT
mNFYC_P1  -----RGTGTGTGTGTGTGTGTGTGTGTGTGTGTGTGCGCGCGCGCTGCACATTAATG
          * * * * *
hNFYC_P1  ATTCTTGGTAAGTACTGTCTT+TATTTCTAGAGGACACTCTTACAGT+TTGGTGCTAAAT
mNFYC_P1  ATCA-----GAGT+TCAGCTTTC-----AGGACTGTGTCTCT+TGCTGCATCT+GGGT
          * * * * *
hNFYC_P1  GCTCTTTTATGAATTTAAGTGCCAGTAGCTGTCTACT-----TGAAGGGCATGCTTAA
mNFYC_P1  TCCAAGAATCGAATTCAGGTGCTC-----CGT+TTGCTGACGCCAGCGGGCTTTTAAA
          * * * * *
hNFYC_P1  TCTGGAAGC--CCATGTGACC+TTCA+TCC+CA-----GTTCTTTCTCCCAAA+TAAAAACAC
mNFYC_P1  TTTTCCATGCCCGGAAGT+TTCTCTCCCTCACCATTCA+TTCTCT+TGAAGAACA+AAAAAC
          * * * * *
hNFYC_P1  AAAATACACACACACGCCCTACTTAGT+TC+TAA+AACTCAAGGGCAGCGGCACACACTAC
mNFYC_P1  GGA-----AACTAT+TTCT+TAA+AAACCGGAAGAGCGAGCG-----
          * * * * *
hNFYC_P1  TTATTTCC+TAAAAT+CAAGCTCGCACAAGGAGATCCACAAGATAGGCAGGGTGGT--GG
mNFYC_P1  -----ATCC+TAGCT-----GAGAGCT+CAAGGATATAGAC+GTCTCCGG
          * * * * *
hNFYC_P1  AGTCTCACTGGGCAGCGCCTCCGAGTCCCGCGAAAGGGGGCGGGGTCAA+AACTCAGATCTC
mNFYC_P1  AGGTCAACGAGAAACGCCTCCCGCGCCCTGGGAAGGGGCGGGGGC-----
          * * * * *
hNFYC_P1  GAGCTCCGCAAAAGGGGGCGGGGT+TAA+AACT+CGA+ATCTCAT+CCGCTCCCTCTGCTG+
mNFYC_P1  -----CCAAAAGT+CTCGGCTCTCACTATCCCG-----
          * * * * *
hNFYC_P1  CGCCCTC-----CCAAT+TC+CGCGAGCCT+CAAGGAGCAGC+CTCGCGCACCGCACGA
mNFYC_P1  TGGCCAGGCAAGCAAT+TC+CGCGAGCCT+CAGGCACT+CAGCGCGT+CGCACA+TGCGGT
          * * * * *
hNFYC_P1  TACTGGGAGT+CGAGCGC+CAAGGGAGGGGGAAGGGA+AAAGGGGAACGGT+GC+AAACGGCG
mNFYC_P1  TGC+TGGGAGT+CGAGCGCGGAGT+GGGGG---AGGGGCGAGGGAAGCGT+CAAAACGGCG
          * * * * *
hNFYC_P1  TGGCGCCATCTTGC+TTGTGCCCCCGCT+CGCGGGCGGCTCC--GTTCTCCGTGACGCACAC
mNFYC_P1  CGCCGCCATCTTGT+TTGCCGCCCGCT+CGCGCAGCGGCTCCGGTT+TTCTGACGCACGC
          * * * * *
hNFYC_P1  TTTCCCTCCCTCCGCGCGGCT+TGGCCCT+TGCAT+TGCCCGACTCCGTAGGAGCGCGGG
mNFYC_P1  TTTCCCTCCCTCCGCGCGGCGCGGGCCT+TGCAT+TGCCCGAGCGGCGAGCAGCGCGGG
          * * * * *
hNFYC_P1  GGGCGCTCTGCTCTCTCGGACTCTGAGCAGAGGTGTGTGAGTGTGCGGGAGT+TTCTG
mNFYC_P1  GGGCGCTCTTCTCTCGCTGGACCGCGGAGTAGAGCCTGTGAGTGTAAAGCT+TGGG
          * * * * *
hNFYC_P1  TGCG--AGGTGATAGGGAAGCGCGCGGGGGAG--GGCAGCGCTTCCCGCTTCGCGC
mNFYC_P1  TGAGAGGGGAGAGAGAGAGGGGGGCGCGCGCAGTAGGGGGGTGTCTCCCGCAATGGC
          * * * * *
hNFYC_P1  AGAGACCTCACTCTCTCGCGCGCGCTGTCTGAGTCTCGTCCGCTCCTGCCCGCGCCAT
mNFYC_P1  GGAAGSCTCCCTCTCCCTCGCGCGCGCGCTGCAT+CTCGTCCGCTCTG--CGCGCGCAT
          * * * * *
hNFYC_P1  GTTGTGCTCTTGCCTGGCCCGCTGCTGTGCGCGCGCGCGCGCTCGTGGGTCCGTGTGCC
mNFYC_P1  GTTATGTGTTCGCGGGGCCCGCGCTGTCTGCTCGCGCTGCGCTCGCGGGTCCGTGTGCC
          * * * * *
hNFYC_P1  TCGTCGCGCCCGCGCGGGCTTTCTCC+ATTGG+GGAGGCGCAGCGCGGGGGGCTCGC
mNFYC_P1  T-----GGCCCGCGGGCTTTCTCC+ATTGG+GGAGGCGCAGCGCGGGGGGCTCGC
          * * * * *
hNFYC_P1  TCGT+ATTGG+CGTGGCGGGGAGCGCGGACCTGGCACCT+ATTGG+CGCGCCAGCTC
mNFYC_P1  TCGT+ATTGG+CGCGCGCGGGGAGCGCGGACCTGGCACCT+ATTGG+CACCGCGGCTC
          * * * * *
hNFYC_P1  CGGTCTAGGGGTGATGAAGAACTGAGGCTGCGGGATGCGCGCTCTTGGCTAGGG
mNFYC_P1  CGCCCTGGGGGTGATGAAGAAATGCGCGCTGTCGGGATGCTAGCTGCTCAGGCTCTGG
          * * * * *
hNFYC_P1  CGCTGGGGCAATGACCCCTCGCGCGAGGCGTGGGT+TGCGCGAGAGGGCGAGCCTA
mNFYC_P1  CGCG--AGGGCGAGG--TCCCTCTAAT+TGCAAGAGT+GCGGGGAGTCT+TCGCGGAGCGAGCGG
          * * * * *

```

### Human vs Mouse P2 alignment

```

hNFYC_P2  --ACAT+TGCTTCTCTGTGCTATTGCCATAGGATCCGTAGCAGTATCTACAGCACTCTT
mNFYC_P2  GCACAT+TGCTTTCTGTGTTACTGCGCATAGT+ACTCTAGCAATATCTACAGCACCCCT
          * * * * *
hNFYC_P2  TGTG+CCAAT+TAGAAGCACTAAAT+TACCTTAAATTTTTTAAATGGAACCTCGACAGCC
mNFYC_P2  TCAAG+CCAAT+TAGAAGCACTAAAT+TACCTTCAATTTTTTAAATGGAACCTCC--ATAGC
          * * * * *
hNFYC_P2  AATAAGAAATCCCGTGGGTGGGAACACTAACACCCCTTTGGCTTGT+TTTT--AAGAACA
mNFYC_P2  AATAAGAAATCCCTTAGGTGGGAATGAGCAGCCCTTCTTCTGGT+TTTTAAGGACAA
          * * * * *
hNFYC_P2  TTCTAAATTTTCAATATCTGTTT+TAGAAGCACATGATGCCCTAGTGCAGCTGCTATGTG
mNFYC_P2  TTCTAAATTTGCCCTCCCTGTT+TAGAAGCGCATGAGACATA--TGCTCTGCTGTGTA
          * * * * *
hNFYC_P2  CATT+TGCCAGACAT+TTCCAGCCT+TAGAGT+TTCCCATAGT+TTGAAGT--CTGAATCTGACC
mNFYC_P2  CATT+TGCTAAATAT+TTCCAGCTCTTA--ASTCTT--GGGT+TGAAGTGAAGAATCTGACC
          * * * * *
hNFYC_P2  CCTGTTCTGCTCTCAAGTA+ACTTAA+ACAGGAAGTGTACAAAAGAGGTA+ACTGATGA
mNFYC_P2  CCTGTTCTGCTCTCAAGTA+ACTTAA+ACAGGAAGTGTACAAAAGAGGTA+ACTGATGA
          * * * * *
hNFYC_P2  CGTGAACA+CCAAT+GTG+GCTTTGTGTTCT+TAGCCGATAAAGCAGT+TCAGCCAAT+GGAC
mNFYC_P2  CGTGAACA+CCAAT+CAT+GCTTTGTGAT+TCT+TAGCTGATAAAGCAGCT+TCAGCCAAT+GGAC
          * * * * *
hNFYC_P2  CACTGTGGAGCAAGGTTTGGTGTCAAATGACATGCTAGAT+GAATGCCTTTGACTGTTA
mNFYC_P2  TGCTTCGAGGCAAGGTTTGGTGTCAAATGACAGCTAGAT+GAATGCCTTTGACTGTTA
          * * * * *
hNFYC_P2  AAGTGAAGGAGGCTGCAGGGCTT+ATTGGAGCC+CGGAGTTTTTCA+TGAGGCAAGGGT
mNFYC_P2  AAGTGAAGGAGGCTGCAGGGCTT+ATTGGAGCC+CGAGTTTTTCA+TGAGGCAAGGGT
          * * * * *
hNFYC_P2  CAGCTGAAGACAAAGAAAAATGGCGAATAGT+TTGTGGGGGTGGGAGGACAGCTGTTC
mNFYC_P2  CAGCTGAAGACAAAGAAAAATGGCGAATAGT+TTGTGGGGGTGGGAGGACAGCTGTTC
          * * * * *
hNFYC_P2  GGGTTTTCA+GTTGAGTGGACAT+TCCAGACTCAT+TTTTCGATCTCTGCTGGCTTTTGT
mNFYC_P2  GGGTTTTCACTGGAATGAACAT+TCCATCTCAGGTTCTGATCTCTCTGCTGGCTTTTGT
          * * * * *
hNFYC_P2  TTCTCCGTCC--TTTGGGGGTAGGATAGGAGTGA+CTAAATCTCCCATCGTCCGG
mNFYC_P2  TCCCTCCGTCTTTTTTGGGGGTAGGATAGGAGTGA+CTAAATCTCCCTGTCGCGAGG
          * * * * *
hNFYC_P2  AGGTATA+AAATACATGATAAAATTAATGAGT+TCGCGTAAGT+TTAATCTTTGTTTT
mNFYC_P2  AGATATA+AAATACATGATAAAATTAATGAGT+TCGCGTAAGT+TTAATCTTTGTTTT
          * * * * *
hNFYC_P2  GTGTTGAATGATAGAACTGTTAGCT+TCAGAGAGTGTAGACAAGTGCACGT--TTCAG
mNFYC_P2  GTGTTGAGATGATAGACAT+TAGCT+TCAGAGAGTGTAGACAAGTGCACGT+TTCAG
          * * * * *
hNFYC_P2  AAAATGGCACTTTACAT+TCCATGCATACCTT--TTGGTGCACCTAGAATACCTGTCTGTG
mNFYC_P2  AAAATGGCACTTTACAT+TCCGTGCATACCT+TCTGTGCACTAGAT+TACCTGTCTGTG
          * * * * *
hNFYC_P2  TTTAGATTTTGCATGTCTTCAACTAGGAT+TTCTTCTAGT+TGGGTATCGACAAGATCA
mNFYC_P2  TTTAGCTTTTGCATGCCCTTCAACTAGAT--TTCTAGT+TTAATATCAACAAGA--CA
          * * * * *
hNFYC_P2  GGTACATGGAGAAAGCTAATCATTTTTT+CAGGGCAGCAGAGAAGCAAACACTTTTCTCT
mNFYC_P2  GATGCA--AAGAGGGCTAATCAGTTTT+CATGGGCATCAGAGAAGCAAACACTTTG--TCT
          * * * * *
hNFYC_P2  TTGCAT+TGGTAAACT+TAAGT+TTTCCAATAA+TTTTCTTGTCTCAAGTGCCTGAAG
mNFYC_P2  TTGCAT+TGGTAAACT+TAAGT+TTTCCAATAA+TTTTCTTGTCTCAAGTGCCTGAAG
          * * * * *
hNFYC_P2  CT+TTCTCAGGAATAAGCTGGT+TGTGTGAGATTTTTCTATTTCCATGCATCTTGTGTG
mNFYC_P2  CT+TTCTCAGGAATAAGATGAGTTTTAAGAGTTTTTTTTTTTCCATGCATCTTGTGTG
          * * * * *
hNFYC_P2  ACATCTGTGTTT+CAGATATGGAAGCAACACTGTGTGTTAGAAATTTGTGTGAAATA
mNFYC_P2  ACATATG--TTTAAAGATGAGAG--ACAT+TAT+TGCTCTCA--TTGCTGAAATA
          * * * * *
hNFYC_P2  CGAT+TTGC--ACTGCTCGAGT+TCTAAT--GTTGAAGGCCACATGCCAGTGTGAATTTTC
mNFYC_P2  TGAAT+TGCAACTGAT+CAGT+TCTAAT+GGGGGAGGGCCACATGCCAGATGAAATTTCT
          * * * * *

```
