# Supplementary material
Source: PubMed Central journal article supplement (PMC2797189)
Supplement: supp_M109.008417_jbc.M109.008417-7.pdf [file supp_M109.008417_jbc.M109.008417-7.pdf]

**SUPPLEMENTARY FIGURE LEGENDS**

**SUP. 1. Human NF-YC mRNAs alignment.** The full alignment of 13 human NF-YC mRNAs present within the GenBank database is reported. The exonic structure of the originally cloned NF-YC is indicated by black lines. Start (ATG) and Stop (TGA) codons are in bold.

**SUP. 2. Intermediate NF-YC mRNAs.** RT-PCRs performed with the Ex8-Ex10 primer pair, after 46 cycles. Intermediate amplicons, not corresponding to the previously reported 37 kDa, 48kDa and 50 kDa transcripts, are present, suggesting other possible arrangements of exons in-between 8 and 10.

**SUP. 3 NF-YC isoform Western Blot.** Full scan of the NF-YC Western Blot showed in FIG 1D. Intermediate isoforms are present, supporting RT-PCR findings (Sup. 2)

**SUP.4 Human and mouse P1 and P2 alignments.** Sequence alignment of human and mouse P1 and P2 regions, +/-500 bp from the annotated TSS (arrow). P1 CCAAT boxes downstream to TSS are also shown.
