# Supplementary material
Source: PubMed Central journal article supplement (PMC2797189)

# Sup 2

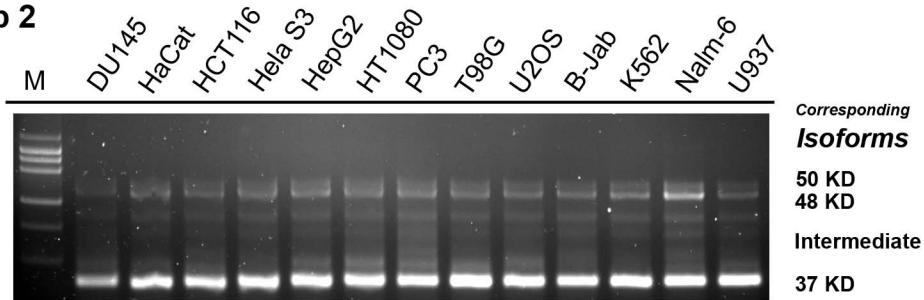

46 RT PCR cycles, ex8 ex10

Supplement: supp_M109.008417_jbc.M109.008417-2.pdf [file supp_M109.008417_jbc.M109.008417-2.pdf]

# Sup 3

DU145  
HaCat  
HCT116  
Hela S3  
HepG2  
HT1080  
PC3  
T98G  
U2OS  
B-Jab  
K562  
Nalm-6  
U937

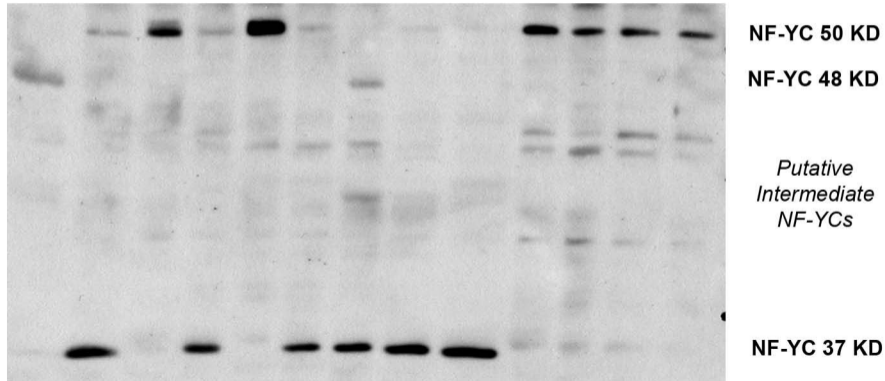

Supplement: supp_M109.008417_jbc.M109.008417-3.pdf [file supp_M109.008417_jbc.M109.008417-3.pdf]
